# Supplementary material
Source: PubMed Central journal article supplement (PMC4575227)
Supplement: NIHMS675899-supplement-SI_Caption.pdf [file NIHMS675899-supplement-SI_Caption.pdf]

**Supplementary Information Figure 1** – Full Scale IQ is associated negatively with MD and RD. No association with FA or AD was found. Warmer colors represent a greater effect of association. Images are shown in radiological convention with left on the right and right on the left.
