# Supplementary material
Source: PubMed Central journal article supplement (PMC4575227)

SI Figure 1

MD – negative association

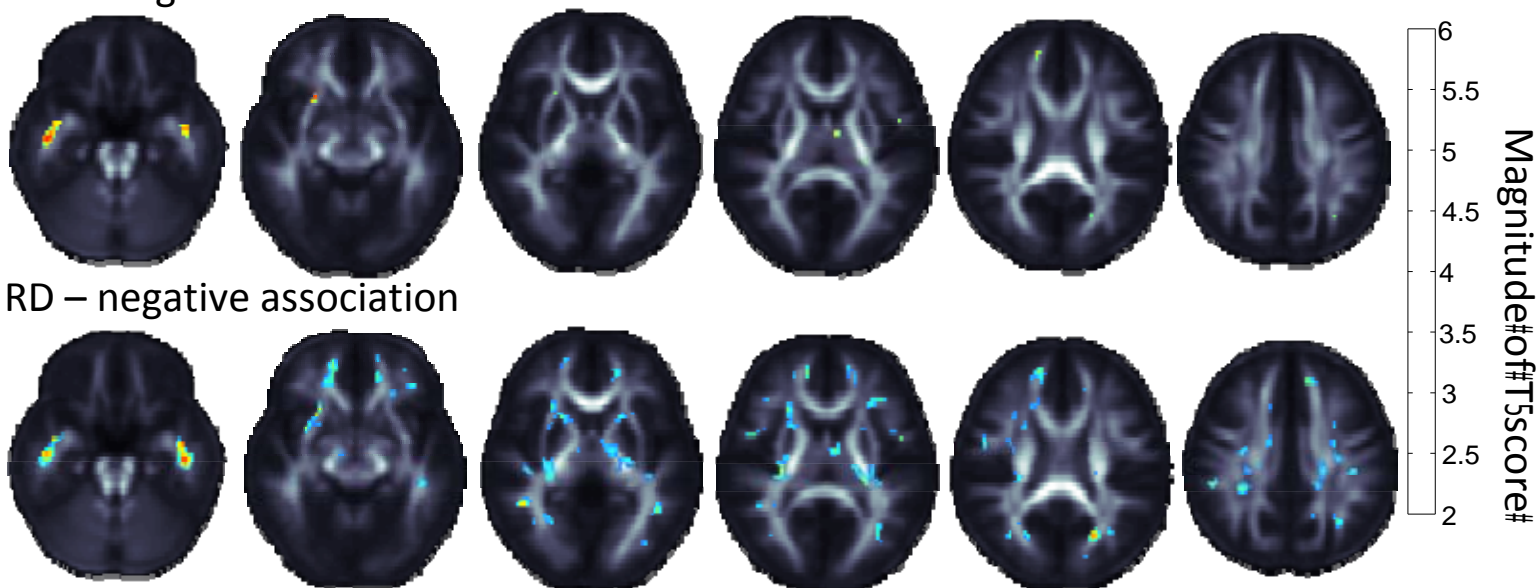

Supplement: NIHMS675899-supplement-SI_Fig1.pdf [file NIHMS675899-supplement-SI_Fig1.pdf]
